# Supplementary material for: Monolithic wood-based carbon supported Pd nanoparticles with tunable exposure for boosting semi-hydrogenation of alkynols
Source: Royal Society of Chemistry journal article supplement (doi:10.1039/d4cy01543f), 2025-01-01
Supplement: d4cy01543f1.pdf [file d4cy01543f1.pdf]

## Supporting Information

# Monolithic Wood-Based Carbon Supported Pd Nanoparticles with Tunable Exposure for Boosting Semi-Hydrogenation of Alkynols

### AUTHOR NAMES

*Cheng-Long Li, Rui-Ping Zhang, Lu Hou, Ya-Dong Xie, An-Hui Lu\**

### AUTHOR ADDRESS

State Key Laboratory of Fine Chemicals, Liaoning Key Laboratory for Catalytic Conversion of Carbon Resources, School of Chemical Engineering, Dalian University of Technology, Dalian 116024, P. R. China

E-mail: anhuilu@dlut.edu.cn

## Supplementary Figures and Tables

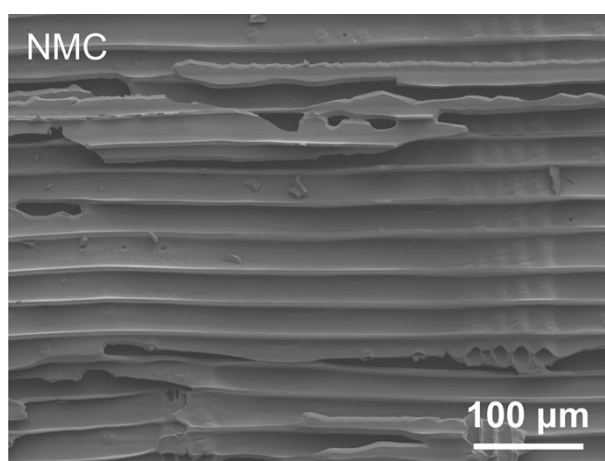

**Fig. S1** SEM image of NMC along the parallel growth direction of the wood.

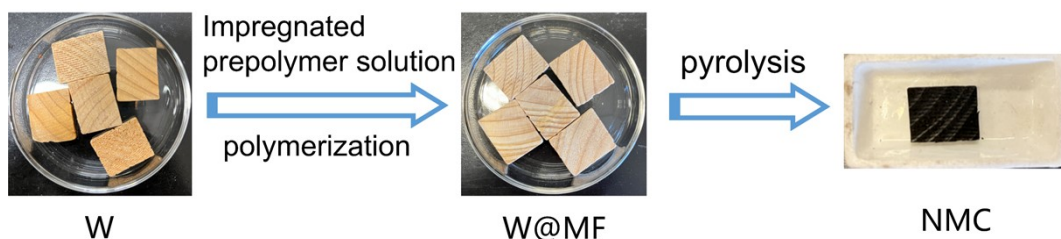

**Fig. S2** Photographs of W, W@MF, and NMC.

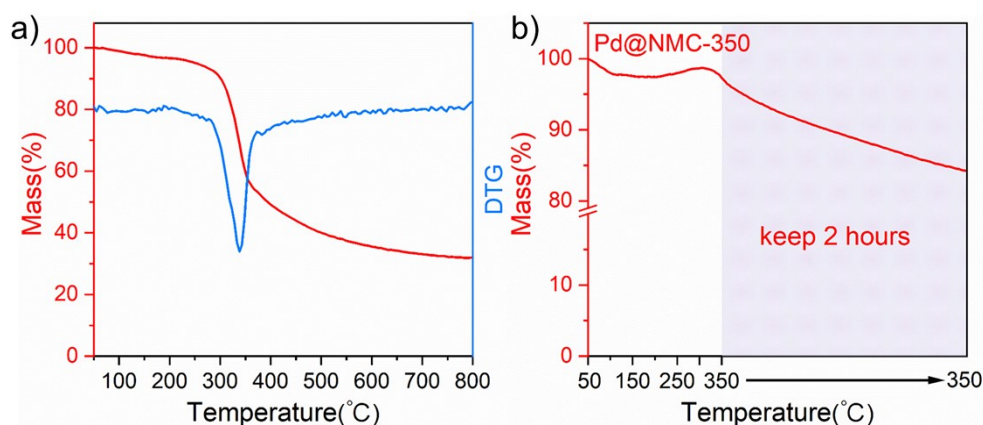

**Fig. S3** a) TG and DTG curves of the W@MF heated from ambient temperature to 800 °C at a rate of 10°C min<sup>-1</sup> under N<sub>2</sub> flow. b) The TG curve of the NMC heated from ambient temperature to 350 °C staying for 2 h at a rate of 10°C min<sup>-1</sup> under the Air flow.

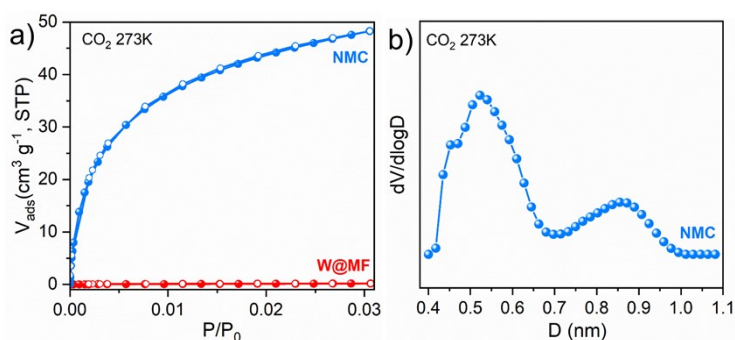

**Fig. S4** a) CO<sub>2</sub> adsorption-desorption isotherms of W@MF and NMC at 273 K.

b) Pore size distribution of NMC determined from CO<sub>2</sub> adsorption at 273 K.

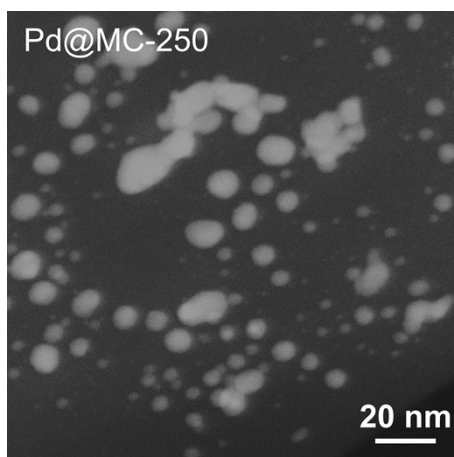

**Fig. S5** STEM image of the Pd@MC-250 catalyst.

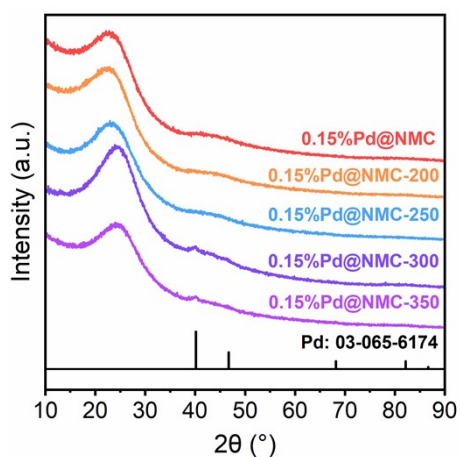

**Fig. S6** XRD patterns of the different monolithic carbon catalysts.

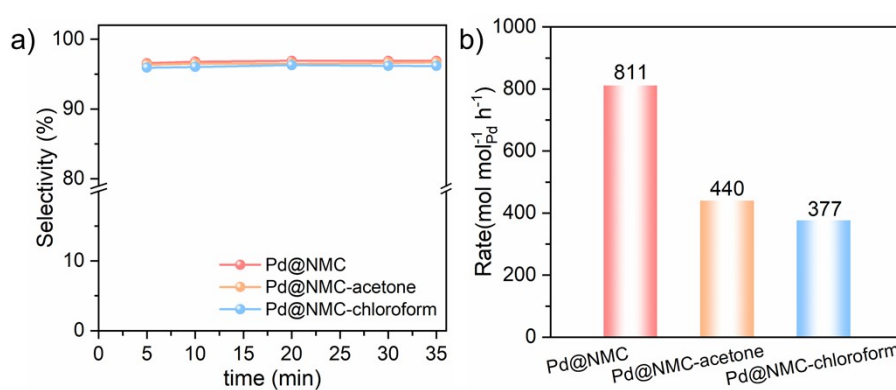

**Fig. S7** a) Selectivity of MBE upon Pd@NMC, Pd@NMC-acetone and Pd@NMC-chloroform. b) Reaction rates of the catalysts.

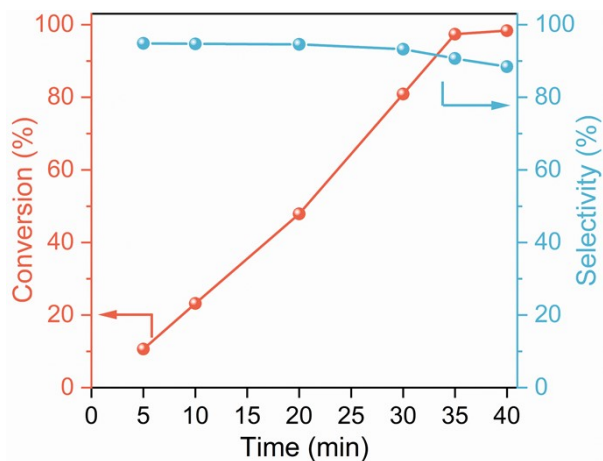

**Fig. S8** Conversion of MBY and selectivity of MBE upon Pd@NMC-250.

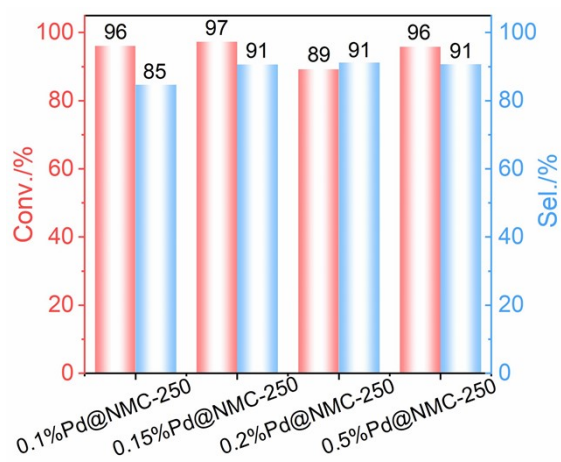

**Fig. S9** Conversion of MBY and selectivity of MBE upon catalysts with different metal loadings.

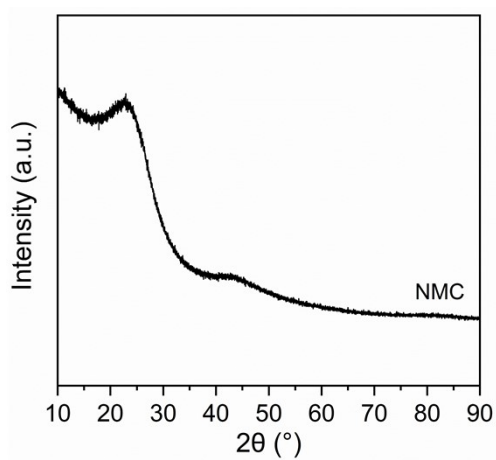

**Fig.S10** XRD patterns of the N-doped monolithic carbon (NMC).

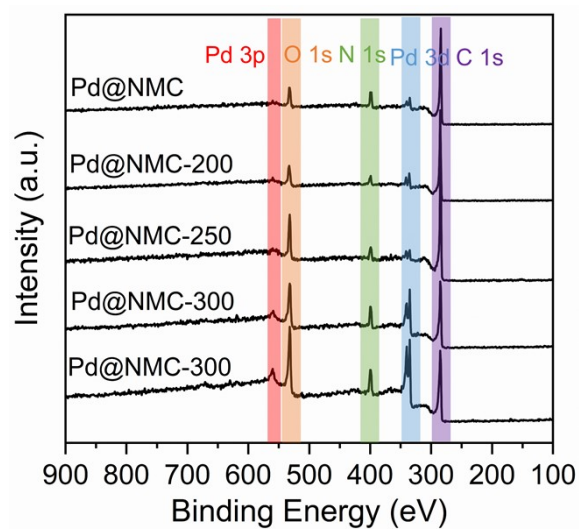

**Fig.S11** XPS spectrum of different monolithic carbon catalysts.

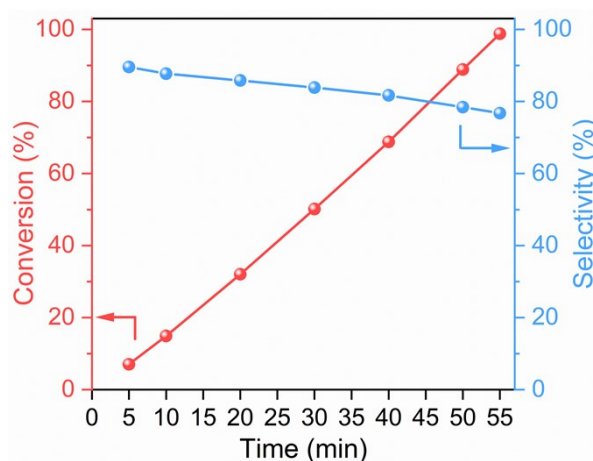

**Fig. S12** Conversion of MBY and selectivity of MBE upon Pd@MC-250.

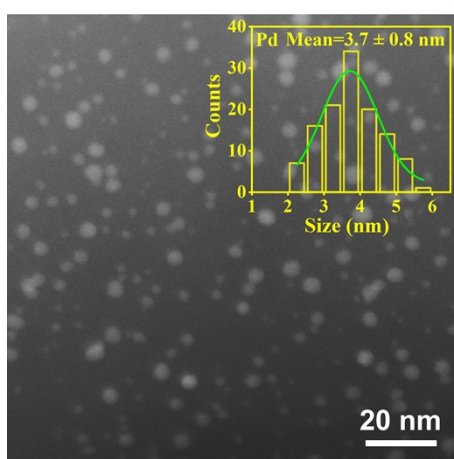

**Fig. S13** STEM image and particle size distribution of the Pd@NMC-250

(The catalyst after five cycles of reaction).

**Table S1** Surface atomic ratio obtained from X-ray photoelectron spectroscopy.

| Sample     | C (%) | N (%) | O (%) | Pd (%) |
|------------|-------|-------|-------|--------|
| Pd@NMC     | 79.12 | 10.93 | 9.29  | 0.66   |
| Pd@NMC-200 | 79.20 | 8.22  | 11.64 | 0.94   |
| Pd@NMC-250 | 76.50 | 6.92  | 15.03 | 1.55   |
| Pd@NMC-300 | 63.38 | 12.33 | 21.45 | 2.84   |
| Pd@NMC-350 | 56.76 | 12.76 | 26.70 | 3.78   |

**Table S2** ICP-OES of the different monolithic carbon catalysts.

| Entry            | Catalysts  | Theoretical Pd loading/wt.% | Actual Pd loading/wt.% |
|------------------|------------|-----------------------------|------------------------|
| 1 <sup>[a]</sup> | Pd@NMC     | 0.150                       | 0.133                  |
| 2 <sup>[a]</sup> | Pd@NMC-200 | 0.150                       | 0.137                  |
| 3 <sup>[a]</sup> | Pd@NMC-250 | 0.150                       | 0.138                  |
| 4 <sup>[b]</sup> | Pd@NMC-250 | 0.150                       | 0.135                  |
| 5 <sup>[a]</sup> | Pd@NMC-300 | 0.150                       | 0.132                  |
| 6 <sup>[b]</sup> | Pd@NMC-300 | 0.150                       | 0.114                  |
| 7 <sup>[a]</sup> | Pd@NMC-350 | 0.150                       | 0.139                  |

[a] As-prepared fresh catalysts; [b] The catalysts after five cycles.

**Table S3** Catalytic performance in the 2-methyl-3-butyn-2-ol hydrogenation reaction over various catalysts.

| Catalysts                                       | Conv. (%) | Sel. (%) | Rate (mol mol <sub>cat</sub> <sup>-1</sup> h <sup>-1</sup> ) | Conditions                  | Ref. |
|-------------------------------------------------|-----------|----------|--------------------------------------------------------------|-----------------------------|------|
| Pd-In/In <sub>2</sub> O <sub>3</sub> -250       | 99        | 95       | 1340                                                         | 30 °C, 1 bar H <sub>2</sub> | [1]  |
| PdZn/CN@ZnO                                     | 96        | 92       | 434                                                          | 35 °C, 5 bar H <sub>2</sub> | [2]  |
| Pd/ZnO/SMF                                      | 100       | 95       | 2556                                                         | 35 °C, 5 bar H <sub>2</sub> | [3]  |
| Pd(B,C)/OMC                                     | 100       | 95       | 3333                                                         | 25 °C, 1 bar H <sub>2</sub> | [4]  |
| UiO-67@Pd@UiO-67                                | 100       | 92       | 15495                                                        | 10 °C, 5 bar H <sub>2</sub> | [5]  |
| Pd/NHPC-DETA-50                                 | 100       | 94       | 6846                                                         | 90 °C, 3 bar H <sub>2</sub> | [6]  |
| Pd <sub>3</sub> S/C <sub>3</sub> N <sub>4</sub> | 85        | 100      | 300                                                          | 30 °C, 1 bar H <sub>2</sub> | [7]  |
| <b>Pd@NMC-250(This Work)</b>                    | 97        | 91       | 5110                                                         | 35 °C, 5 bar H <sub>2</sub> |      |

## Notes and references

- [1] M. Tang, J. Deng, M. Li, X. Li, H. Li, Z. Chen and Y. Wang, *Green Chem.*, 2019, **21**, 4143.
- [2] L. Shen, S. Mao, J. Li, M. Li, P. Chen, H. Li, Z. Chen and Y. Wang, *J. Catal.*, 2017, **350**, 13.
- [3] N. Semagina, M. Grasmann, N. Xanthopoulos, A. Renken and L. Kiwi-Minsker, *J. Catal.*, 2007, **251**, 213.
- [4] Y. Yang, X. Zhu, L. Wang, J. Lang, G. Yao, T. Qin, Z. Ren, L. Chen, X. Liu, W. Li and Y. Wan, *Nature Commun.*, 2022, **13**, 2754.
- [5] K. Choe, F. Zheng, H. Wang, Y. Yuan, W. Zhao, G. Xue, X. Qiu, M. Ri, X. Shi, Y. Wang, G. Li and Z. Tang, *Angew. Chem. Int. Ed.*, 2020, **59**, 3650.
- [6] Q. Luo, Z. Wang, Y. Chen, S. Mao, K. Wu, K. Zhang, Q. Li, G. Lv, G. Huang, H. Li and Y. Wang, *ACS Appl. Mater. Interfaces*, 2021, **13**, 31775.
- [7] D. Albani, M. Shahrokhi, Z. Chen, S. Mitchell, R. Hauert, N. López and J. Pérez-Ramírez, *Nat. Commun.*, 2018, **9**, 2634.
